# Supplementary material
Source: MDPI journal article supplement (https://www.mdpi.com/2073-4360/4/3/1613)
Supplement: s1 [file s1]

**Dye-sensitized Solar Cells with New One-Dimensional
Halide-Bridged Cu(I)–Ni(II) Heterometal Coordination Polymers Containing** **Hexamethylene Dithiocarbamate Ligand**

**Takashi Okubo 1,*, Naoya Tanaka 1, Haruho Anma 1, Kyung Ho Kim 2, Masahiko Maekawa 1 and Takayoshi Kuroda-Sowa 1**

***Supporting Information***

**Figure S1.** Asymmetric unit of a mononuclear complex [Ni(Hm-dtc)2] [1] (**a**), and packing diagrams of [Ni(Hm-dtc)2] viewed along *a*-axis (**b**) and *b*-axis (**c**): Ni, green; S, yellow; C, white; N, blue. Hydrogen atoms are omitted for clarity. The intermolecular nearest neighbor S•••S separation is 4.060 Å, which is larger than that of the sum of the van der Waals radii of the sulfur atoms.


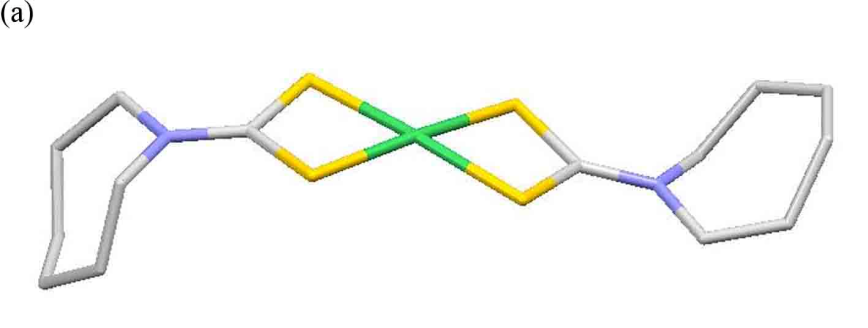


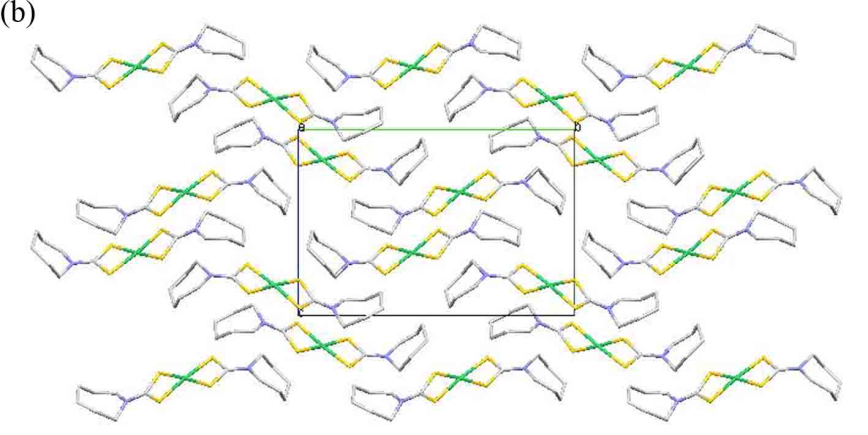


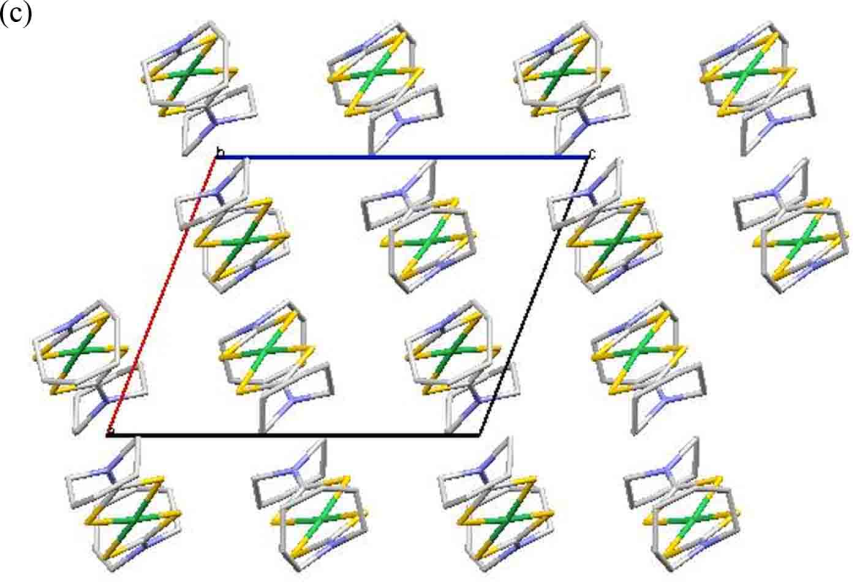


**Figure S2.** Photoemission yield curve of the coordination polymers **3** under atmospheric condition.

**Figure S3.** Transmission spectra with KBr powder pressed pellets including the coordination polymers **1a** (red, solid line), **1b** (blue, solid line), **2a** (red, broken line) and **2b** (blue, broken line). Each coordination polymer (0.5 µmol) was grinded with KBr powder (50 mg) in a mortar for 5 min, and then the mixture was pressed in a pellet maker of Ø 13 mm.

**Table S1.** Crystal Data and Structure Refinement Parameters for **1a** and **1b**.

| **Empirical Formula** | **C18H30Br2Cu2N4NiS4** | **C18H30Cu2I2N4NiS4** |
| --- | --- | --- |
| Formula Weight | 776.30 | 870.30 |
| Crystal System | monoclinic | monoclinic |
| Lattice Parameters | *a* = 10.3600(6) Å | *a* = 10.3943(8) Å |
| – | *b* = 8.1909(5) Å | *b* = 8.2724(6) Å |
| – | *c* = 15.962(2) Å | *c* = 16.385(2) Å |
| – | *β* = 105.983(3) º | *b* = 106.045(3) º |
| – | *V* = 1302.1(2) Å3 | *V* = 1354.0(2) Å3 |
| Space Group | P21/c (#14) | P21/c (#14) |
| *Z* value | 2 | 2 |
| *D*calc | 1.980 g/cm3 | 2.135 g/cm3 |
| *F*000 | 772.00 | 844.00 |
| *µ*(MoKα) | 57.481 cm−1 | 48.495 cm−1 |
| No. Observations (All reflections) | 2966 | 3060 |
| No. Variables | 142 | 142 |
| Reflection/Parameter Ratio | 20.89 | 21.55 |
| Residuals: *R*1 (*I* > 2.00 *σ*(*I*)) a | 0.0315 | 0.0262 |
| Residuals: *wR*2 (All reflections) *b* | 0.0775 | 0.0651 |
| Goodness of Fit Indicator | 1.088 | 1.074 |
| Max Shift/Error in Final Cycle | 0.001 | 0.002 |
| Maximum peak in Final Diff. Map | 1.12 e/Å3 | 1.14 e/Å3 |
| Minimum peak in Final Diff. Map | −0.67 e/Å3 | −0.58 e/Å3 |

*a* *R*1 = S||Fo|−|Fc||/S|Fo|; *b* *wR*2 = [S(w(Fo2−Fc2)2)/Sw(Fo2)2] 1/2.

**Table S2.** Atomic coordinates and *B*iso/*B*eq and occupancy for **1a**.

| **atom** | **x** | **y** | **z** | **Beq** | **occ** |
| --- | --- | --- | --- | --- | --- |
| Br1 | 0.99954(2) | 0.66675(3) | 0.08998(2) | 1.508(7) | 1 |
| Cu1 | 0.86456(3) | 0.43957(3) | 0.00980(2) | 1.505(8) | 1 |
| Ni1 | 0.5000 | 0.5000 | 0.0000 | 1.08(1) | 1/2 |
| S1 | 0.47509(5) | 0.23344(7) | 0.01180(4) | 1.39(2) | 1 |
| S2 | 0.65228(5) | 0.50847(6) | −0.07508(4) | 1.20(2) | 1 |
| N1 | 0.2910(2) | 0.1747(2) | 0.1005(2) | 1.15(4) | 1 |
| N2 | 0.8467(2) | 0.2548(3) | 0.0860(2) | 1.59(4) | 1 |
| C1 | 0.3593(2) | 0.2794(3) | 0.0675(2) | 1.17(4) | 1 |
| C2 | 0.3074(3) | −0.0025(3) | 0.0895(2) | 1.31(4) | 1 |
| C3 | 0.4035(3) | −0.0796(3) | 0.1702(2) | 1.63(5) | 1 |
| C4 | 0.3404(3) | −0.1128(3) | 0.2441(2) | 1.61(4) | 1 |
| C5 | 0.2831(3) | 0.0387(3) | 0.2773(2) | 1.68(4) | 1 |
| C6 | 0.1617(3) | 0.1113(3) | 0.2093(2) | 1.41(4) | 1 |
| C7 | 0.1953(3) | 0.2343(3) | 0.1471(2) | 1.55(4) | 1 |
| C8 | 0.8270(3) | 0.1458(3) | 0.1247(2) | 1.49(4) | 1 |
| C9 | 0.8033(3) | 0.0045(3) | 0.1737(2) | 1.89(5) | 1 |
| H2A | 0.3416 | −0.0207 | 0.0395 | 1.58 | 1 |
| H2B | 0.2205 | −0.0553 | 0.0781 | 1.58 | 1 |
| H3A | 0.4367 | −0.1817 | 0.1534 | 1.95 | 1 |
| H3B | 0.4798 | −0.0076 | 0.1914 | 1.95 | 1 |
| H4A | 0.4077 | −0.1614 | 0.2923 | 1.93 | 1 |
| H4B | 0.2688 | −0.1919 | 0.2243 | 1.93 | 1 |
| H5A | 0.3529 | 0.1211 | 0.2938 | 2.01 | 1 |
| H5B | 0.2564 | 0.0098 | 0.3291 | 2.01 | 1 |
| H6A | 0.1111 | 0.0225 | 0.1753 | 1.70 | 1 |
| H6B | 0.1039 | 0.1639 | 0.2397 | 1.70 | 1 |
| H7A | 0.1128 | 0.2659 | 0.1044 | 1.86 | 1 |
| H7B | 0.2325 | 0.3312 | 0.1798 | 1.86 | 1 |
| H9A | 0.8002 | 0.0384 | 0.2307 | 2.27 | 1 |
| H9B | 0.8747 | −0.0729 | 0.1790 | 2.27 | 1 |
| H9C | 0.7194 | −0.0453 | 0.1437 | 2.27 | 1 |

Beq = 8/3 π2(U11(aa*)2 + U22(bb*)2 + U33(cc*)2 + 2U12(aa*bb*)cosγ + 2U13(aa*cc*)cosβ + 2U23(bb*cc*)cosα).

**Table S3.** Anisotropic displacement parameters for **1a**.

| **atom** | **U11** | **U22** | **U33** | **U12** | **U13** | **U23** |
| --- | --- | --- | --- | --- | --- | --- |
| Br1 | 0.0186(2) | 0.0187(2) | 0.0214(2) | −0.00145(8) | 0.0079(1) | −0.00402(9) |
| Cu1 | 0.0188(2) | 0.0156(2) | 0.0229(2) | 0.0008(1) | 0.0059(2) | 0.0030(2) |
| Ni1 | 0.0127(2) | 0.0110(2) | 0.0187(3) | −0.0003(2) | 0.0065(2) | 0.0002(2) |
| S1 | 0.0192(3) | 0.0123(3) | 0.0247(4) | 0.0003(2) | 0.0118(3) | −0.0008(3) |
| S2 | 0.0144(3) | 0.0115(3) | 0.0204(4) | 0.0007(2) | 0.0063(3) | −0.0001(2) |
| N1 | 0.0153(9) | 0.0127(9) | 0.017(2) | −0.0001(7) | 0.0057(8) | −0.0006(8) |
| N2 | 0.0194(9) | 0.018(1) | 0.024(2) | 0.0015(8) | 0.0066(9) | 0.0025(9) |
| C1 | 0.0134(9) | 0.014(1) | 0.016(2) | 0.0008(9) | 0.0020(9) | 0.000(1) |
| C2 | 0.023(1) | 0.011(1) | 0.019(2) | −0.0022(9) | 0.010(1) | −0.0008(9) |
| C3 | 0.018(1) | 0.017(1) | 0.027(2) | 0.0028(9) | 0.007(1) | 0.003(1) |
| C4 | 0.020(1) | 0.018(1) | 0.020(2) | −0.001(1) | 0.002(1) | 0.004(1) |
| C5 | 0.024(1) | 0.024(2) | 0.015(2) | −0.002(1) | 0.005(1) | 0.001(1) |
| C6 | 0.018(1) | 0.018(1) | 0.020(2) | −0.0022(9) | 0.0080(9) | 0.000(1) |
| C7 | 0.022(1) | 0.018(1) | 0.023(2) | 0.004(1) | 0.014(1) | 0.002(1) |
| C8 | 0.015(1) | 0.018(1) | 0.023(2) | 0.0014(9) | 0.0050(9) | −0.001(1) |
| C9 | 0.026(2) | 0.020(2) | 0.027(2) | −0.001(1) | 0.011(1) | 0.006(1) |

The general temperature factor expression: exp(−2π2(a*2U11h2 + b*2U22k2 + c*2U33l2 + 2a*b*U12hk
+ 2a*c*U13hl + 2b*c*U23kl)).

**Table S4.** Bond lengths (Å) of **1a**.

| **atom** | **atom** | **distance** | **atom** | **atom** | **distance** |
| --- | --- | --- | --- | --- | --- |
| Br1 | Cu1 | 2.4638(4) | Br1 | Cu11 | 2.5519(5) |
| Cu1 | S2 | 2.3130(6) | Cu1 | N2 | 1.982(3) |
| Ni1 | S1 | 2.2127(6) | Ni1 | S12 | 2.2127(6) |
| Ni1 | S2 | 2.2296(7) | Ni1 | S22 | 2.2296(7) |
| S1 | C1 | 1.721(3) | S2 | C12 | 1.748(3) |
| N1 | C1 | 1.311(4) | N1 | C2 | 1.478(3) |
| N1 | C7 | 1.476(4) | N2 | C8 | 1.136(4) |
| C2 | C3 | 1.530(4) | C3 | C4 | 1.521(5) |
| C4 | C5 | 1.532(4) | C5 | C6 | 1.537(4) |
| C6 | C7 | 1.521(4) | C8 | C9 | 1.455(4) |

Symmetry Operators: (1) –X + 2, −Y + 1, −Z; (2) –X + 1, −Y + 1, −Z.

**Table S5.** Bond angles (°) of **1a**.

| **atom** | **atom** | **atom** | **angle** |  | **atom** | **atom** | **atom** | **angle** |
| --- | --- | --- | --- | --- | --- | --- | --- | --- |
| Cu1 | Br1 | Cu11 | 75.513(13) |  | Br1 | Cu1 | Br11 | 104.487(15) |
| Br1 | Cu1 | S2 | 115.602(17) |  | Br1 | Cu1 | N2 | 113.18(6) |
| Br11 | Cu1 | S2 | 108.46(3) |  | Br11 | Cu1 | N2 | 106.45(7) |
| S2 | Cu1 | N2 | 108.14(6) |  | S1 | Ni1 | S12 | 180.00(3) |
| S1 | Ni1 | S2 | 101.12(2) |  | S1 | Ni1 | S22 | 78.88(2) |
| S12 | Ni1 | S2 | 78.88(2) |  | S12 | Ni1 | S22 | 101.12(2) |
| S2 | Ni1 | S22 | 180.00(3) |  | Ni1 | S1 | C1 | 86.69(8) |
| Cu1 | S2 | Ni1 | 112.14(3) |  | Cu1 | S2 | C12 | 105.92(7) |
| Ni1 | S2 | C12 | 85.51(9) |  | C1 | N1 | C2 | 120.2(3) |
| C1 | N1 | C7 | 119.84(19) |  | C2 | N1 | C7 | 120.0(2) |
| Cu1 | N2 | C8 | 174.43(18) |  | S1 | C1 | S22 | 108.91(14) |
| S1 | C1 | N1 | 126.48(18) |  | S22 | C1 | N1 | 124.6(2) |
| N1 | C2 | C3 | 112.0(2) |  | C2 | C3 | C4 | 114.0(2) |
| C3 | C4 | C5 | 114.5(2) |  | C4 | C5 | C6 | 112.8(3) |
| C5 | C6 | C7 | 115.3(2) |  | N1 | C7 | C6 | 114.6(2) |
| N2 | C8 | C9 | 179.0(3) |  |  |  |  |  |

Symmetry Operators: (1) –X + 2, −Y + 1, −Z; (2) –X + 1, −Y + 1, −Z.

**Table S6.** Atomic coordinates and *B*iso/*B*eq and occupancy for **1b**.

| **atom** | **x** | **y** | **z** | **Beq** | **occ** |
| --- | --- | --- | --- | --- | --- |
| I1 | 0.49533(2) | 0.68231(2) | 0.59291(2) | 1.516(6) | 1 |
| Cu1 | 0.36501(3) | 0.43638(4) | 0.50844(2) | 1.524(8) | 1 |
| Ni1 | 0.0000 | 0.5000 | 0.5000 | 1.06(1) | 1/2 |
| S1 | 0.14932(6) | 0.50473(8) | 0.42604(4) | 1.13(2) | 1 |
| S2 | −0.02597(7) | 0.23743(8) | 0.51224(5) | 1.39(2) | 1 |
| N1 | 0.2058(3) | 0.8170(3) | 0.3984(2) | 1.05(4) | 1 |
| N2 | 0.3429(3) | 0.2569(4) | 0.5845(2) | 1.69(4) | 1 |
| C1 | 0.1388(3) | 0.7146(4) | 0.4322(2) | 1.08(4) | 1 |
| C2 | 0.2977(3) | 0.7561(4) | 0.3506(2) | 1.53(5) | 1 |
| C3 | 0.3312(3) | 0.8767(4) | 0.2904(2) | 1.43(5) | 1 |
| C4 | 0.2117(3) | 0.9517(4) | 0.2249(2) | 1.87(5) | 1 |
| C5 | 0.1550(3) | 1.1015(4) | 0.2578(2) | 1.75(5) | 1 |
| C6 | 0.0953(3) | 1.0701(4) | 0.3310(2) | 1.79(5) | 1 |
| C7 | 0.1914(3) | 0.9928(4) | 0.4091(2) | 1.40(5) | 1 |
| C8 | 0.3190(3) | 0.1534(4) | 0.6233(2) | 1.50(5) | 1 |
| C9 | 0.2886(4) | 0.0192(4) | 0.6726(3) | 1.94(5) | 1 |
| H2A | 0.2568 | 0.6597 | 0.3177 | 1.83 | 1 |
| H2B | 0.3820 | 0.7211 | 0.3918 | 1.83 | 1 |
| H3A | 0.3887 | 0.8224 | 0.2596 | 1.72 | 1 |
| H3B | 0.3845 | 0.9650 | 0.3244 | 1.72 | 1 |
| H4A | 0.2396 | 0.9819 | 0.1739 | 2.24 | 1 |
| H4B | 0.1400 | 0.8696 | 0.2076 | 2.24 | 1 |
| H5A | 0.2275 | 1.1822 | 0.2761 | 2.10 | 1 |
| H5B | 0.0850 | 1.1494 | 0.2102 | 2.10 | 1 |
| H6A | 0.0165 | 0.9986 | 0.3108 | 2.15 | 1 |
| H6B | 0.0633 | 1.1740 | 0.3482 | 2.15 | 1 |
| H7A | 0.2803 | 1.0448 | 0.4198 | 1.68 | 1 |
| H7B | 0.1579 | 1.0122 | 0.4593 | 1.68 | 1 |
| H9A | 0.3681 | −0.0491 | 0.6927 | 2.33 | 1 |
| H9B | 0.2151 | −0.0450 | 0.6369 | 2.33 | 1 |
| H9C | 0.2620 | 0.0615 | 0.7215 | 2.33 | 1 |

Beq = 8/3 π2(U11(aa*)2 + U22(bb*)2 + U33(cc*)2 + 2U12(aa*bb*)cosγ + 2U13(aa*cc*)cosβ + 2U23(bb*cc*)cosα).

**Table S7.** Anisotropic displacement parameters for **1b**.

| **atom** | **U11** | **U22** | **U33** | **U12** | **U13** | **U23** |
| --- | --- | --- | --- | --- | --- | --- |
| I1 | 0.0168(1) | 0.0204(1) | 0.0217(2) | −0.00260(7) | 0.00739(8) | −0.00546(7) |
| Cu1 | 0.0199(2) | 0.0158(2) | 0.0219(2) | 0.0010(2) | 0.0053(2) | 0.0025(2) |
| Ni1 | 0.0117(2) | 0.0112(3) | 0.0185(3) | −0.0011(2) | 0.0058(2) | 0.0007(2) |
| S1 | 0.0130(3) | 0.0111(3) | 0.0197(4) | −0.0002(3) | 0.0058(3) | −0.0000(3) |
| S2 | 0.0182(3) | 0.0122(3) | 0.0267(4) | −0.0003(3) | 0.0130(3) | −0.0005(3) |
| N1 | 0.014(1) | 0.010(1) | 0.017(2) | 0.0001(9) | 0.0072(9) | −0.0002(8) |
| N2 | 0.018(2) | 0.021(2) | 0.024(2) | 0.002(1) | 0.005(1) | 0.002(1) |
| C1 | 0.012(1) | 0.013(2) | 0.016(2) | 0.001(1) | 0.003(1) | −0.001(1) |
| C2 | 0.023(2) | 0.017(2) | 0.022(2) | 0.004(2) | 0.015(2) | 0.002(1) |
| C3 | 0.020(2) | 0.019(2) | 0.018(2) | −0.004(2) | 0.009(1) | 0.000(1) |
| C4 | 0.026(2) | 0.026(2) | 0.017(2) | −0.001(2) | 0.004(2) | 0.000(2) |
| C5 | 0.021(2) | 0.018(2) | 0.024(2) | −0.001(2) | 0.000(2) | 0.005(2) |
| C6 | 0.019(2) | 0.016(2) | 0.033(2) | 0.001(2) | 0.009(2) | 0.004(2) |
| C7 | 0.023(2) | 0.012(2) | 0.021(2) | −0.004(1) | 0.012(2) | −0.001(1) |
| C8 | 0.016(2) | 0.020(2) | 0.022(2) | 0.001(2) | 0.005(1) | 0.001(2) |
| C9 | 0.029(2) | 0.020(2) | 0.029(2) | 0.001(2) | 0.014(2) | 0.004(2) |

The general temperature factor expression: exp(−2π2(a*2U11h2 + b*2U22k2 + c*2U33l2 + 2a*b*U12hk
+ 2a*c*U13hl + 2b*c*U23kl)).

**Table S8.** Bond lengths (Å) of **1b**.

| **atom** | **atom** | **distance** | **atom** | **atom** | **distance** |
| --- | --- | --- | --- | --- | --- |
| I1 | Cu1 | 2.6178(4) | I1 | Cu11 | 2.6761(5) |
| Cu1 | S1 | 2.3443(7) | Cu1 | N2 | 1.993(3) |
| Ni1 | S1 | 2.2178(8) | Ni1 | S12 | 2.2178(8) |
| Ni1 | S2 | 2.2048(7) | Ni1 | S22 | 2.2048(7) |
| S1 | C1 | 1.744(3) | S2 | C12 | 1.718(4) |
| N1 | C1 | 1.312(4) | N1 | C2 | 1.481(5) |
| N1 | C7 | 1.478(4) | N2 | C8 | 1.134(5) |
| C2 | C3 | 1.510(5) | C3 | C4 | 1.531(4) |
| C4 | C5 | 1.532(5) | C5 | C6 | 1.518(6) |
| C6 | C7 | 1.529(4) | C8 | C9 | 1.458(5) |

Symmetry Operators: (1) –X + 1, −Y + 1, −Z + 1; (2) –X, −Y + 1, −Z + 1.

**Table S9.** Bond angles (°) of **1b**.

| **atom** | **atom** | **atom** | **angle** |  | **atom** | **atom** | **atom** | **angle** |
| --- | --- | --- | --- | --- | --- | --- | --- | --- |
| Cu1 | I1 | Cu11 | 71.154(12) |  | I1 | Cu1 | I11 | 108.846(14) |
| I1 | Cu1 | S1 | 112.94(2) |  | I1 | Cu1 | N2 | 112.38(8) |
| I11 | Cu1 | S1 | 109.12(3) |  | I11 | Cu1 | N2 | 106.92(9) |
| S1 | Cu1 | N2 | 106.42(7) |  | S1 | Ni1 | S12 | 180.00(4) |
| S1 | Ni1 | S2 | 100.89(3) |  | S1 | Ni1 | S22 | 79.11(3) |
| S12 | Ni1 | S2 | 79.11(3) |  | S12 | Ni1 | S22 | 100.89(3) |
| S2 | Ni1 | S22 | 180.00(4) |  | Cu1 | S1 | Ni1 | 112.54(3) |
| Cu1 | S1 | C1 | 105.77(8) |  | Ni1 | S1 | C1 | 85.49(11) |
| Ni1 | S2 | C12 | 86.52(10) |  | C1 | N1 | C2 | 119.9(3) |
| C1 | N1 | C7 | 120.1(3) |  | C2 | N1 | C7 | 119.9(3) |
| Cu1 | N2 | C8 | 173.9(3) |  | S1 | C1 | S22 | 108.87(16) |
| S1 | C1 | N1 | 124.7(3) |  | S22 | C1 | N1 | 126.5(3) |
| N1 | C2 | C3 | 114.8(3) |  | C2 | C3 | C4 | 115.9(3) |
| C3 | C4 | C5 | 113.4(3) |  | C4 | C5 | C6 | 114.9(3) |
| C5 | C6 | C7 | 114.7(3) |  | N1 | C7 | C6 | 112.1(3) |
| N2 | C8 | C9 | 179.4(4) |  |  |  |  |  |

Symmetry Operators: (1) –X + 1, −Y + 1, −Z + 1; (2) –X, −Y + 1, −Z + 1.

**Reference**

1. Ivanov, A.V.; Ivakhnenko, E.V.; Forsling, W.; Gerasimenko, A.V.; Bukvetskii, B.V. A comparative study of the structural organization of nickel(II) and copper(II) complexes with dialkyl-substituted and cyclic diethyldithiocarbamate ligands by X-ray crystallography, EPR, and CP/MAS 13C and 15N NMR. *Russ. J. Inorg. Chem.* **2002**, *47*, 468–480.

© 2012 by the authors; licensee MDPI, Basel, Switzerland. This article is an open access article distributed under the terms and conditions of the Creative Commons Attribution license (http://creativecommons.org/licenses/by/3.0/).
